# Supplementary material for: Unbiased in vivo exploration of nuclear bodies-enhanced sumoylation reveals that PML orchestrates embryonic stem cell fate
Source: bioRxiv or medRxiv preprint supplement (doi:10.1101/2021.06.29.450368), 2021-06-29
Supplement: Supplementary file [file media-3.pdf]

# Tessier et al. Figure Supplementary 3

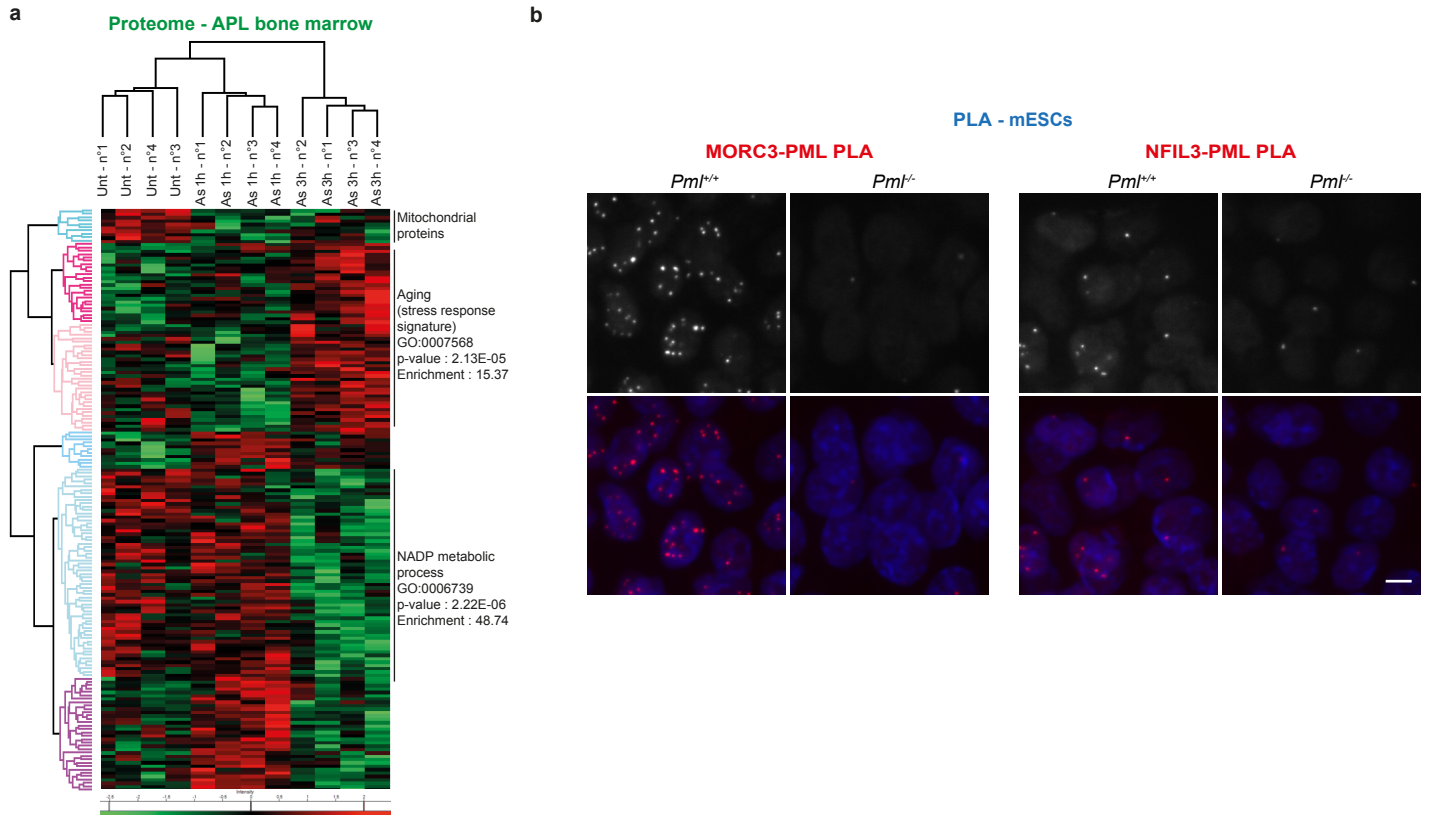

## Supplementary Figure 3.

(a) Heat map analysis of total APL proteome (LFQ LC-MS/MS) upon arsenic treatment. The different clusters are indicated on the right with their associated GOBP signatures. (b) Proximity ligation assays showing interaction (<40nm) between endogenous PML and NFIL3 or MORC3 (red dots) in the indicated mESCs. Dapi (blue), scale bar: 5µm.
