# Supplementary material for: Unbiased in vivo exploration of nuclear bodies-enhanced sumoylation reveals that PML orchestrates embryonic stem cell fate
Source: bioRxiv or medRxiv preprint supplement (doi:10.1101/2021.06.29.450368), 2021-06-29
Supplement: Supplementary file [file media-8.pdf]

#### Adaptors

| Name                    | Sequence                                  |
|-------------------------|-------------------------------------------|
| His10_xhoI_NotI-Reverse | CTGGTACGTAGTGGTAGTGGTAGTAGTAGTAGTACGCCGG  |
| His10_xhoI_NotI-Forward | TCGAGACCATGCATCCATCACCATCATCATCATCATCATGC |

#### Primers for CHIP

| Gene or TE name     | Forward primer              | Reverse primer                | Reference                             |
|---------------------|-----------------------------|-------------------------------|---------------------------------------|
| Actin               | 5' CCTCGATGCTGACCTCATCC 3'  | 5' GACATGCCCCATTCAATGCTC 3'   | Benabddallah NS 2019                  |
| EthERV2             | 5' ACAAAATCAGTATGGGCATC 3'  | 5' GGGTACTGTTAAGACCCACA 3'    | Bulut-Karslioglu 2015; Reichmann 2012 |
| Eth 5' LTR-MusD int | 5' CCCTCTCTCATACTGGTGCGA 3' | 5' TAGCATCTCTGCGATTCTCAGG 3'  | Thompson et al 2015                   |
| Gapdh               | 5' ATCTGTAGGCCAGGTGATG 3'   | 5' AGGCTCAAGGGCTTTAAGG 3'     | Kato 2018                             |
| IAP2E-chr10         | 5' GTGCTGCCTTACAACCTG 3'    | 3' AAGACGACGCAAAACCAAT 3'     | Reichman 2011                         |
| LINE-1 promoter     | 5' ACTGCGGTACATAGGGAAG 3'   | 5' TGTGATCACTCACCAGAGG 3'     | Bulut-Karslioglu 2015                 |
| MERVL 5' LTR-int    | 5' CTTCCATTCACAGCTGCACTG 3' | 5' CTAGAACAACCTCTGGTACCAAC 3' | Thompson 2015                         |
| MLV 5' LTR-int      | 5' TGGGACGGGTCTCCAAATCT 3'  | 5' ATAAAGCTCTGCTGTTGCATC 3'   | Thompson et al 2015                   |

#### Primers for Q-RT-PCR

| Gene or TE name  | Forward primer                 | Reverse primer                | Reference                                    |
|------------------|--------------------------------|-------------------------------|----------------------------------------------|
| Actin            | 5' TAGGCACAGGTGTGATGG 3'       | 5' CATGGCTGGGGTGTGAAGG 3'     | De Iaco 2017                                 |
| Dux              | 5' AAAGGAAGCATGTGCCAGC 3'      | 5' GCAGTAAGCTGCTCTGGGAA 3'    | De Iaco 2017                                 |
| EthERV2          | 5' ACAAAATCAGTATGGGCATC 3'     | 5' GGGTACTGTTAAGACCCACA 3'    | Bulut-Karslioglu 2015 Reichmann et al., 2012 |
| Igf5             | 5' GCGAAGTAGCGCGACGTTT 3'      | 5' CTGGAACCTGATGTTCCG 3'      | This study                                   |
| Gapdh            | 5' TCATGACAACCTTTGGCATTG 3'    | 5' CAGTCTCTGGGTGGCAGTGA 3'    | De Iaco 2017                                 |
| IAP2E            | 5' ACGGGAACACTTATACCACC 3'     | 5' TTGAGAAGGATCAACTGCGTG 3'   | De Iaco 2017                                 |
| Klf4             | 5' GAAGGGAGAAGCACTGCGT 3'      | 5' GCCACTCTCCAGCTCTGTG 3'     | This study                                   |
| Lefty1           | 5' CAGCTGATCAACCGCAGT 3'       | 5' GGCTGCATGGCTGTGTT 3'       | Kim 2014                                     |
| LINE-1 promoter  | 5' ACTGCGGTACATAGGGAAG 3'      | 5' TGTGATCACTCACCAGAGG 3'     | Bulut-Karslioglu 2015                        |
| Mae1             | 5' CGATTCATTGCCAGCTGC 3'       | 5' AACAGATTGCTGGTATGCC 3'     | De Iaco 2019                                 |
| MERVL 5' LTR-int | 5' ATCTCTGCGCACCTGGTATG 3'     | 5' AGAAGAAGGCATTGCCAGA 3'     | De Iaco 2017                                 |
| MLV RLTR MM-int  | 5' AGAGGTATGGTGAATAAGTA 3'     | 5' TAGTAGGAGCCTCAAGCTCTCAA 3' | Thompson et al 2015                          |
| Nanog            | 5' AAAGGATGAAGTGAAGCGG 3'      | 5' CTCAGATGCGTTCACCG 3'       | This study                                   |
| Prex2            | 5' AGCATGTGAGTCTGACGGTG 3'     | 5' AGGGCTCCAGAATCTTGGC 3'     | De Iaco 2019                                 |
| Oct4             | 5' TCTTCCACAGCCCGGCTC 3'       | 5' TCGCGGCGACATGGGGATCC 3'    | Cossec 2018                                  |
| Zscan4           | 5' AAATGCCATTGTCTGTTCCCTATG 3' | 5' TGTGGTAATCTCAGGTGACGAT 3'  | De Iaco 2017                                 |

#### CRISPR/Cas9

| Target                             | Target sequence            | ssDNA donor sequence                                                       |
|------------------------------------|----------------------------|----------------------------------------------------------------------------|
| <i>Pml</i> knock-out in mESC       | 5' GCTGTGTTCATAGTCTTCGG 3' | -                                                                          |
| <i>Pml</i> E167R knock-in in mouse | 5' -CAAGCATGAGGCCCGGCC-3'  | 5' CAAGTCTTCAAGCACACAGTGGTACTCAAGCATAGGCCCGCCCTGGCTGATCTCCGCACAATTGAGTGA3' |

#### Primers for His6-HA-SUMO1; *Pml*<sup>+/+</sup>, *Pml*<sup>-/-</sup>, *Pml*<sup>E167R/+</sup> mouse genotyping

| Target                    | Primers for PCR             | Expected size                                                           | Primer for sequencing |
|---------------------------|-----------------------------|-------------------------------------------------------------------------|-----------------------|
| <i>Pml</i> <sup>-/-</sup> | 5' AAGCCATACAGGAGGAATTCA 3' | <i>Pml</i> <sup>+/+</sup> : 443 bp<br><i>Pml</i> <sup>-/-</sup> : 660bp | 5' AGCCAAAGTGCCCAAC3' |
|                           | 5' GTGGTTGGTATTGGAGCAA 3'   |                                                                         |                       |
| <i>Pml</i> E167R          | 5' ATCAGATGATCTGGACGAAG3'   | <i>Pml</i> <sup>+/+</sup> : 443 bp                                      | 5' AGCCAAAGTGCCCAAC3' |
|                           | 5' AAGCCATACAGGAGGAATTCA 3' |                                                                         |                       |
| His6-HA-Sumo1             | 5' GTGGTTGGTATTGGAGCAA 3'   | endogenous <i>Sumo1</i> : 163bp<br>tagged <i>Sumo1</i> : 210bp          | 5' AGCCAAAGTGCCCAAC3' |
|                           | 5' GGAAAGTGACGACAGCTAGA 3'  |                                                                         |                       |
|                           | 5' CCGGTACTGGTCAAGCAT3'     |                                                                         |                       |
|                           | 5' GAGCGTAATCTGGAACATCTGA3' |                                                                         |                       |

#### Antibodies

| Target                                                                               | Source                 | Reference     |
|--------------------------------------------------------------------------------------|------------------------|---------------|
| Actin                                                                                | Sigma                  | # A2066       |
| DPPA2                                                                                | Millipore              | # MAB4356     |
| HA                                                                                   | BioLegend              | # 901501      |
| H3K9me3                                                                              | Abcam                  | # ab8898      |
| MBP                                                                                  | Sigma                  | # M1321       |
| MORC3                                                                                | Biotechne              | # NBP1-83036  |
| E4BP4/NFIL3                                                                          | Cell signaling         | # 14312       |
| PML                                                                                  | Millipore              | # MAB3738     |
| SUMO1                                                                                | Millipore              | # AB3875      |
| SUMO2/3                                                                              | Abcam                  | # ab81371     |
| Trim28/Kap1                                                                          | Cell signaling         | # 4124        |
| Ubiquitin                                                                            | Enzo                   | # BML-PW8810  |
| Rabbit IgG, polyclonal-isotype control                                               | Diagenode              | # C15410206   |
| Goat anti-Rabbit IgG (H+L) Cross-Adsorbed Secondary Antibody, Alexa Fluor 568        | ThermoFischer          | # A-11011     |
| Goat anti-Rabbit IgG (H+L) Highly Cross-Adsorbed Secondary Antibody, Alexa Fluor 488 | ThermoFischer          | # A-11034     |
| Alexa Fluor 488-AffiniPure Goat Anti-Mouse IgG (H+L)                                 | Jackson immunoresearch | # 115-545-003 |
| Alexa Fluor 594-AffiniPure Goat Anti-Mouse IgG (H+L)                                 | Jackson immunoresearch | # 115-585-003 |
| Alexa Fluor 647-AffiniPure Goat Anti-Rabbit IgG (H+L)                                | Jackson immunoresearch | # 111-605-003 |
| Alexa Fluor 647-AffiniPure Goat Anti-Rabbit IgG (H+L)                                | Jackson immunoresearch | # 115-605-003 |
